# Supplementary material for: Artepillin C Time−Dependently Alleviates Metabolic Syndrome in Obese Mice by Regulating CREB/CRTC2−BMAL1 Signaling
Source: MDPI journal article supplement (doi:10.3390/nu15071644), 2023-03-28
Supplement: s1 [file s1]

**Figure S1.**

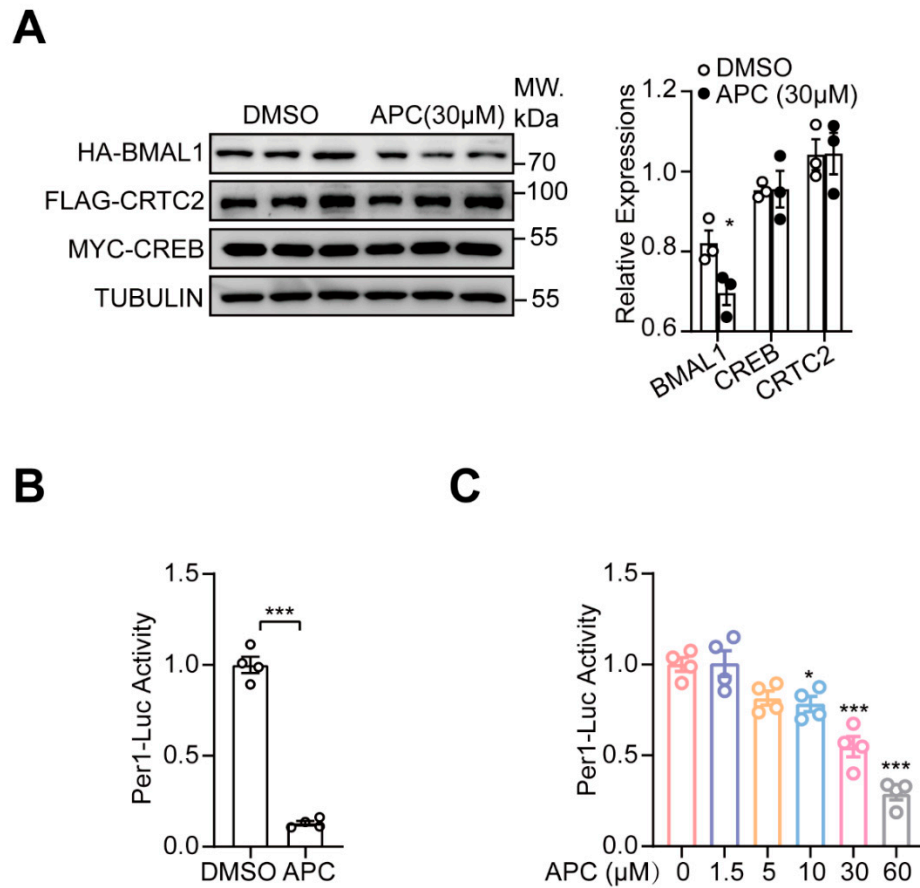

**Figure S1.** APC inhibits hepatic BMAL1 and PER1 expression. (A) Immunoblotting of overexpression protein levels of HA-BMAL1, FLAG-CRTC2, MYC-CREB, and TUBULIN in HEK 293T cell treated with DMSO or APC (30 μM) for 1 h prior to 7 h stimulation with forskolin (100 nM,  $n = 3$  per treatment). (B) Luciferase Per1-Luc activity. HEK293T cell were infected by Per1-Luc and RSV-β-Gal for 24 h, then incubated with APC (30 μM) for 1h prior to forskolin 7 h before luciferase assay ( $n = 4$  per treatment). (C) Primary hepatocytes were infected by AD-Per1-Luc and AD-RSV-β-Gal for 24 h, then incubated with APC (0, 1.5, 5, 10, 30, 60 μM) for 1 h prior to 7 h stimulation with glucagon (100 nM,  $n = 4$  per treatment) Different colors represent different group treated with different concentrations of APC. \*  $p < 0.05$ ; \*\*  $p < 0.01$ ; \*\*\*  $p < 0.001$

**Figure S2.**

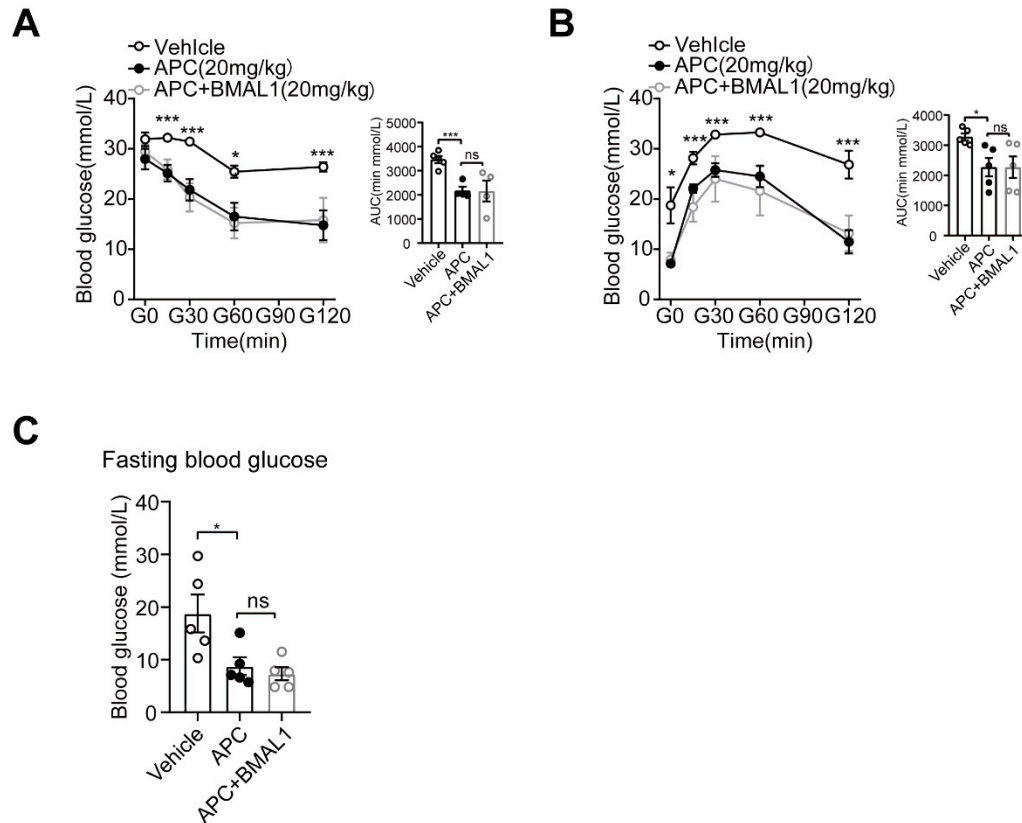

**Figure S2.** Overexpression BMAL1 in the livers of *db/db* mice did not affect APC-mediated glucose homeostasis. (A) Insulin tolerance test (ITT) and (B) pyruvate tolerance test (PTT) of *db/db* mice administrated APC or Vehicle for two weeks at ZT 20. The *db/db* mice was injected with adenovirus overexpressing BMAL1 or GFP. The results of area under curve (AUC) are shown at the bottom of each test curve ( $n = 4-5$  per group). (C) The fasting blood glucose levels. The *db/db* mice were treated by APC (20 mg/kg) for 2 weeks ( $n = 5$  per group). \*  $p < 0.05$ ; \*\*  $p < 0.01$ ; \*\*\*  $p < 0.001$

**Table S1. Primers of Real-Time PCR**

| Gene           | qPCR primers                                                      |
|----------------|-------------------------------------------------------------------|
| <i>Bmal1</i>   | 5'- TGCAGAACACCAAGGAAGGA -3'<br>5'-ATTTTGTCCCGACGCCTCTT-3'        |
| <i>Dbp</i>     | 5'-CTGGCCCGAGTCTTTTTGC-3'<br>5'-CCAGGTCCACGTATTCCACG-3'           |
| <i>Per1</i>    | 5'- AGCAGGACAACCCATCTACCA-3'<br>5'- CGAAGTTTGAGCTCCCGAAGT-3'      |
| <i>G6pc</i>    | 5'- TCTGTCCCGGATCTACCTTG -3'<br>5'- GTAGAATCCAAGCGCGAAAC -3'      |
| <i>Pepck</i>   | 5'- GTGCTGGAGTGGATGTTCGG -3'<br>5'- CTGGCTGATTCTCTGTTTCAGG -3'    |
| <i>Srebp1c</i> | 5'- GCGGAGCCATGGATTGCAC-3'<br>5'- CTCTTCCTTGATAACCAGGCCC-3'       |
| <i>Srebp2</i>  | 5'- GCGTTCTGGAGACCATGGA-3'<br>5'- ACAAAGTTGCTCTGAAAACAAATCA-3'    |
| <i>Fasn</i>    | 5'- GCTGCGGAAACTTCAGGAAAT-3'<br>5'- AGAGACGTGTCACTCCTGGACTT-3'    |
| <i>Scd1</i>    | 5'- CCGGAGACCCCTTAGATCGA -3'<br>5'- TAGCCTGTAAAAGATTTCTGCAAACC-3' |
| <i>Acc</i>     | 5'- TGACAGACTGATCGCAGAGAAAG-3'<br>5'- TGGAGAGCCCCACACACA-3'       |
| <i>L32</i>     | 5'- TCTGGTGAAGCCCAAGATCG -3'<br>5'- CTCTGGGTTTCCGCCAGTT -3'       |
| <i>Crtc2</i>   | 5'- CACCAGAACTTGACCCACTGT -3'<br>5'- CACAGGGGTCACTCAGCATAG -3'    |

**Table S2. Primary antibodies for western blotting**

| Antibodies name    | Company                | Dilution |
|--------------------|------------------------|----------|
| BMAL1              | Abcam, ab3350          | 1:1000   |
| PER1               | Abclonal, A8449        | 1:1000   |
| DBP                | Abcam, ab22824         | 1:1000   |
| HA                 | CST, 3724              | 1:2000   |
| Myc                | CST, 18583             | 1:2000   |
| M2 Flag-HRP        | Sigma, A8592           | 1:4000   |
| SREBP1(2A4)        | Santa cruze, sc-13551  | 1:2000   |
| ACC                | Beyotime, AF1867       | 1:2000   |
| SCD                | Abcam, ab19862         | 1:1000   |
| FASN               | Beyotime, AF5168       | 1:1000   |
| ACTIN              | Abmart, T40104         | 1:8000   |
| TUBULIN            | Abmart, T40103         | 1:8000   |
| GAPDH              | AGOMA, AGM90111        | 1:8000   |
| PEPCK(H-300)       | Santa cruze, sc-32879  | 1:1000   |
| G6pase             | Proteintech,22169-1-AP | 1:1000   |
| CRTC2              | Millipore, ST1099      | 1:8000   |
| CREB               | CST, 9197              | 1:1000   |
| Phospho-CREB(S133) | CST, 9198              | 1:1000   |
